# Supplementary material
Source: publisher figshare collection journal article supplement (https://aacr.figshare.com/articles/dataset/_/22465664)
Supplement: Supplementary file 1 [file 39917036]

\$PROBLEM IOV model  
\$INPUT ID DATE TIME DV MDV AMT RATE EVID BSA  
\$DATA IOVwhole.prn  
\$SUBROUTINES ADVAN3 TRANS4  
\$PK

OCC1=0  
OCC2=0  
OCC3=0  
OCC4=0  
OCC5=0  
OCC6=0  
OCC7=0  
OCC8=0  
OCC9=0

IF(DATE.EQ.1) OCC1=1  
IF(DATE.EQ.2) OCC2=1  
IF(DATE.EQ.3) OCC3=1

IF(DATE.EQ.22) OCC4=1  
IF(DATE.EQ.23) OCC5=1  
IF(DATE.EQ.24) OCC6=1

IF(DATE.EQ.43) OCC7=1  
IF(DATE.EQ.44) OCC8=1  
IF(DATE.EQ.45) OCC9=1

TVCL=THETA(1)  
A=ETA(1)  
B=ETA(2)\*OCC1+ETA(3)\*OCC2+ETA(4)\*OCC3  
C=ETA(5)\*OCC4+ETA(6)\*OCC5+ETA(7)\*OCC6  
D=ETA(8)\*OCC7+ETA(9)\*OCC8+ETA(10)\*OCC9  
E=ETA(11)\*(OCC1+OCC2+OCC3)+ETA(12)\*(OCC4+OCC5+OCC6)+ETA(13)\*(OCC7+OCC8+OCC9)

CL=TVCL\*EXP(A+B+C+D+E)

TVV1=THETA(2)\*BSA  
TVQ=THETA(3)  
TVV2=THETA(4)\*BSA  
V1=TVV1\*EXP(ETA(14))  
Q=TVQ\*EXP(ETA(15))  
V2=TVV2\*EXP(ETA(16))  
S1=V1  
AUC=AMT/CL

\$THETA (1,7,18) ; CL  
\$THETA (1,3.4,20) ; V1  
\$THETA (0.1,9.4,30) ; Q  
\$THETA (0.1,4,) ; V2

\$OMEGA 0.1 ;iiv CL  
\$OMEGA BLOCK(1) 0.01;IOVCL C1  
\$OMEGA BLOCK(1) SAME  
\$OMEGA BLOCK(1) SAME

\$OMEGA BLOCK(1) 0.1 ;IOVCL C2  
\$OMEGA BLOCK(1) SAME  
\$OMEGA BLOCK(1) SAME  
\$OMEGA BLOCK(1) 0.1 ;IOVCL C3  
\$OMEGA BLOCK(1) SAME  
\$OMEGA BLOCK(1) SAME  
\$OMEGA BLOCK(1) 0.1 ;IOVCL intercycle  
\$OMEGA BLOCK(1) SAME  
\$OMEGA BLOCK(1) SAME  
\$OMEGA 0.01 ;iiv V1  
\$OMEGA 0 FIXED ;iiv Q  
\$OMEGA 0.05 ;iiv V2

\$ERROR  
DEL=0  
IF (F.EQ.0) DEL=1  
W=F+DEL  
Y=F+W\*EPS(1)  
IPRED=F  
IRES=DV-IPRED  
IWRES=IRES/W

\$\$SIGMA .1

\$ESTIMATION METHOD=1 INTERACTION SIGDIGITS=3 NOABORT

\$COVARIANCE PRINT=E

\$TABLE ID DATE TIME CL AUC TVCL DV V1 V2 IPRED PRED  
MDV EVID ONEHEADER NOPRINT FILE=IOVwholedataPARAM.PAR  
\$TABLE ID TIME IPRED IWRES NOPRINT ONEHEADER FILE=sdtab1  
\$TABLE ID CL V1 Q V2 ETA(1) ETA(2) ETA(3) ETA(4) ETA(5)  
ETA(6) ETA(7) NOPRINT ONEHEADER FILE=pattab1
